# Supplementary material for: Nuclear peripheral chromatin-lamin B1 interaction is required for global integrity of chromatin architecture and dynamics in human cells
Source: PubMed Central journal article supplement (PMC8934373; doi:10.1007/s13238-020-00794-8), 2020-11-05
Supplement: 13238_2020_794_MOESM1_ESM.pdf [file 13238_2020_794_MOESM1_ESM.pdf]

## Supplementary materials

**Table S1 Quality control statistics for lamin A ChIP-seq data processing.**

|                      | <b>WT-r1</b> | <b>WT-r2</b> | <b>WT-r3</b> | <b>WT-input</b> |
|----------------------|--------------|--------------|--------------|-----------------|
| <b>Raw Reads</b>     | 13,282,558   | 13,159,405   | 16,918,646   | 21,972,529      |
| <b>Cut adapter</b>   | 13,278,333   | 13,155,291   | 16,913,689   | 21,969,306      |
| <b>Mapping Rate</b>  | 97.11%       | 97.30%       | 96.97%       | 96.45%          |
| <b>rm duplicates</b> | 11,437,609   | 11,339,059   | 14,303,429   | 18,954,709      |
| <b>rm LowMAPQ</b>    | 10,209,282   | 10,170,347   | 12,685,977   | 15,976,666      |
|                      | <b>KO-r1</b> | <b>KO-r2</b> | <b>KO-r3</b> | <b>KO-input</b> |
| <b>Raw Reads</b>     | 16,354,928   | 11,908,170   | 17,430,764   | 20,086,104      |
| <b>Cut adapter</b>   | 16,349,893   | 11,903,514   | 17,425,796   | 20,082,833      |
| <b>Mapping Rate</b>  | 96.87%       | 96.11%       | 96.94%       | 96.39%          |
| <b>rm duplicates</b> | 13,957,698   | 10,481,812   | 14,659,780   | 17,239,813      |
| <b>rm LowMAPQ</b>    | 12,330,442   | 9,163,410    | 12,946,388   | 14,833,466      |

Remaining read pairs after each filtering step.

**Table S2 LAD coverage on each chromosome in WT and lamin B1-KO cells.**

| <b>Chromosome</b> | <b>WT (%)</b> | <b>Lamin B1 KO (%)</b> |
|-------------------|---------------|------------------------|
| <b>chr1</b>       | 41            | 26                     |
| <b>chr2</b>       | 51            | 34                     |
| <b>chr3</b>       | 63            | 35                     |
| <b>chr4</b>       | 76            | 35                     |
| <b>chr5</b>       | 58            | 34                     |
| <b>chr6</b>       | 49            | 25                     |
| <b>chr7</b>       | 46            | 33                     |
| <b>chr8</b>       | 53            | 36                     |
| <b>chr9</b>       | 37            | 22                     |
| <b>chr10</b>      | 33            | 31                     |
| <b>chr11</b>      | 52            | 35                     |
| <b>chr12</b>      | 46            | 30                     |
| <b>chr13</b>      | 50            | 21                     |
| <b>chr14</b>      | 37            | 23                     |
| <b>chr15</b>      | 21            | 23                     |
| <b>chr16</b>      | 20            | 30                     |
| <b>chr17</b>      | 11            | 13                     |
| <b>chr18</b>      | 53            | 37                     |
| <b>chr19</b>      | 1             | 9                      |
| <b>chr20</b>      | 26            | 26                     |
| <b>chr21</b>      | 33            | 15                     |
| <b>chr22</b>      | 0             | 5                      |
| <b>chrX</b>       | 66            | 48                     |

**Table S3 Diagram of different classes of LADs.**

|                        | LAD (1) or non-LAD (0) |       |             |       |
|------------------------|------------------------|-------|-------------|-------|
|                        | Constitutive           |       | Facultative |       |
|                        | cLAD                   | ciLAD | fLAD        | fiLAD |
| <b>MDA-MB-231</b>      | 1                      | 0     | 1           | 0     |
| <b>hESC</b>            | 1                      | 0     |             |       |
| <b>HT1080</b>          | 1                      | 0     | <=2         | >=1   |
| <b>Tig3</b>            | 1                      | 0     |             |       |
| <b>Total size (Mb)</b> | 612                    | 1011  | 774         | 466   |

**Table S4 Quality control statistics for Hi-C data processing.**

|                                                  | WT-r1       | WT-r2       | Lamin B1 KO-r1 | Lamin B1 KO-r2 |
|--------------------------------------------------|-------------|-------------|----------------|----------------|
| <b>Total read pairs<sup>[1]</sup></b>            | 138,193,618 | 223,885,207 | 250,362,318    | 253,024,668    |
| <b>Uniquely aligned read pairs<sup>[2]</sup></b> | 108,155,179 | 172,561,205 | 182,642,642    | 194,536,722    |
|                                                  | 78.26%      | 77.08%      | 72.95%         | 76.88%         |
| <b>Valid interaction<sup>[3]</sup></b>           | 95,264,155  | 152,469,233 | 148,123,567    | 166,884,723    |
|                                                  | 88.08%      | 88.36%      | 81.10%         | 85.79%         |
| <b>Self-Circle<sup>[4]</sup></b>                 | 123,564     | 178,371     | 520,046        | 222,818        |
|                                                  | 0.11%       | 0.10%       | 0.28%          | 0.11%          |
| <b>Dangling-end<sup>[5]</sup></b>                | 2,726,851   | 4,213,273   | 13,818,685     | 6,521,973      |
|                                                  | 2.52%       | 2.44%       | 7.57%          | 3.35%          |
| <b>Valid interaction rmdup<sup>[6]</sup></b>     | 79,041,927  | 131,026,015 | 129,693,005    | 134,947,244    |
|                                                  | 73.08%      | 75.93%      | 71.01%         | 69.37%         |
| <b>Trans_interaction<sup>[7]</sup></b>           | 7,834,781   | 13,603,317  | 15,747,086     | 16,307,003     |
|                                                  | 9.91%       | 10.38%      | 12.14%         | 12.08%         |
| <b>Cis_interaction<sup>[8]</sup></b>             | 71,207,146  | 117,422,698 | 113,945,919    | 118,640,241    |
|                                                  | 90.09%      | 89.62%      | 87.86%         | 87.92%         |
| <b>Cis_shortRange<sup>[9]</sup></b>              | 22,113,855  | 34,770,742  | 37,869,246     | 39,050,597     |
|                                                  | 31.06%      | 29.61%      | 33.23%         | 32.92%         |
| <b>Cis_longRange<sup>[10]</sup></b>              | 49,093,291  | 82,651,956  | 76,076,673     | 79,589,644     |
|                                                  | 68.94%      | 70.39%      | 66.77%         | 67.08%         |

The percentage denominators of [2] are the read pair numbers in [1]; the percentage denominators of [3][4][5][6] are the uniquely aligned read pair numbers in [2]; the percentage denominators of [7][8] are in [6]; and the percentage denominators of [9][10] are in [8].

**Table S5 Design of sgRNAs**

| Genome coordinates               | Sequence of sgRNAs                                      | Compartment |    | LAD |     | Repeat number |
|----------------------------------|---------------------------------------------------------|-------------|----|-----|-----|---------------|
|                                  |                                                         | WT          | KO | WT  | KO  |               |
| Chr2:<br>1218818-<br>1227201     | GAGGUGCUGGAUCGCUGUAGAGG                                 | B           | B  | Yes | Yes | 100           |
| Chr2:<br>6378242-<br>6379050     | AGCGUCACCGUUCACUGCGGCGG/GGG                             | B           | B  | Yes | Yes | 23            |
| Chr2:<br>36410123-<br>36411725   | AUAUCUAUCUAUCGAUACAUAGG/GGG<br>GUAUAUAUCUAUAUCUAUCUAUGG | B           | B  | Yes | Yes | 24            |
| Chr2:<br>114408189-<br>114411271 | GAUACCCUGAGCUCAUGACUCAGAGG                              | NA          | NA | No  | No  | 40            |
| Chr2:<br>135364479-<br>135367491 | GACAGACCCCGAGAACUGUGCUGG                                | B           | B  | No  | Yes | 60            |
| Chr2:<br>235554023-<br>235558288 | GCAGUGGGAGUAGGGAGGCAGUGGG                               | A           | A  | No  | No  | 65            |
| Chr18:<br>13673058-<br>13676522  | GCUCAGGAAUGUAAUAAUCAGG                                  | B           | A  | No  | No  | 63            |
| Chr18:<br>44926826-<br>44929361  | GUGGAAAGGCACAGUGUGGUGG                                  | A           | A  | No  | No  | 23            |
| Chr18:<br>77567735-<br>77569657  | GGGCCCAUAACGUGGAGUGUGG                                  | A           | A  | No  | No  | 27            |
| Chr19:<br>1627737-<br>1629139    | GAAGGGGACAGCAGAGCUCACGGG/AGG                            | A           | A  | No  | No  | 36            |
| Chr19:<br>59050388-<br>59054262  | CUGUCUGAGGAGGGAAGCAGGG                                  | A           | A  | No  | No  | 69            |

Firstly, the human genome sequence of chromosome 2 (GRCh37/hg19 Assembly) was downloaded from the UCSC genome browser. Secondly, the undetermined regions “Ns” were replaced by randomly generated nucleotides “A”, “T”, “G”, or “C”. Thirdly, the modified sequence was inputted to the Tandem Repeat Finder bioinformatics tool to identify tandem repeats. Lastly, the results were summarized. Highly conserved repeats with less mutation and proper repeat unit length and repeat number were selected as candidates for live cell imaging.

**Table S6 Statistics of LAD status alterations in WT and lamin B1 KO cells**

|                             | <b>non-LAD</b> | <b>LAD</b> | <b>Non-LAD to LAD</b> | <b>LAD to non-LAD</b> |
|-----------------------------|----------------|------------|-----------------------|-----------------------|
| <b>Total size (Mb)</b>      | 1,401          | 821        | 74                    | 565                   |
| <b>Gene #</b>               | 20,142         | 2,878      | 508                   | 2,768                 |
| <b>Gene density (#/Mb)</b>  | 14.38          | 3.51       | 6.86                  | 4.90                  |
| <b>Upregulated gene #</b>   | 336            | 11         | 1                     | 11                    |
| <b>Downregulated gene #</b> | 399            | 8          | 4                     | 82                    |
